# Supplementary material
Source: PubMed Central journal article supplement (PMC5100789)
Supplement: supp_pp.16.00945_PP2016-00945R1_Supplemental_Material_1.pdf [file supp_pp.16.00945_PP2016-00945R1_Supplemental_Material_1.pdf]

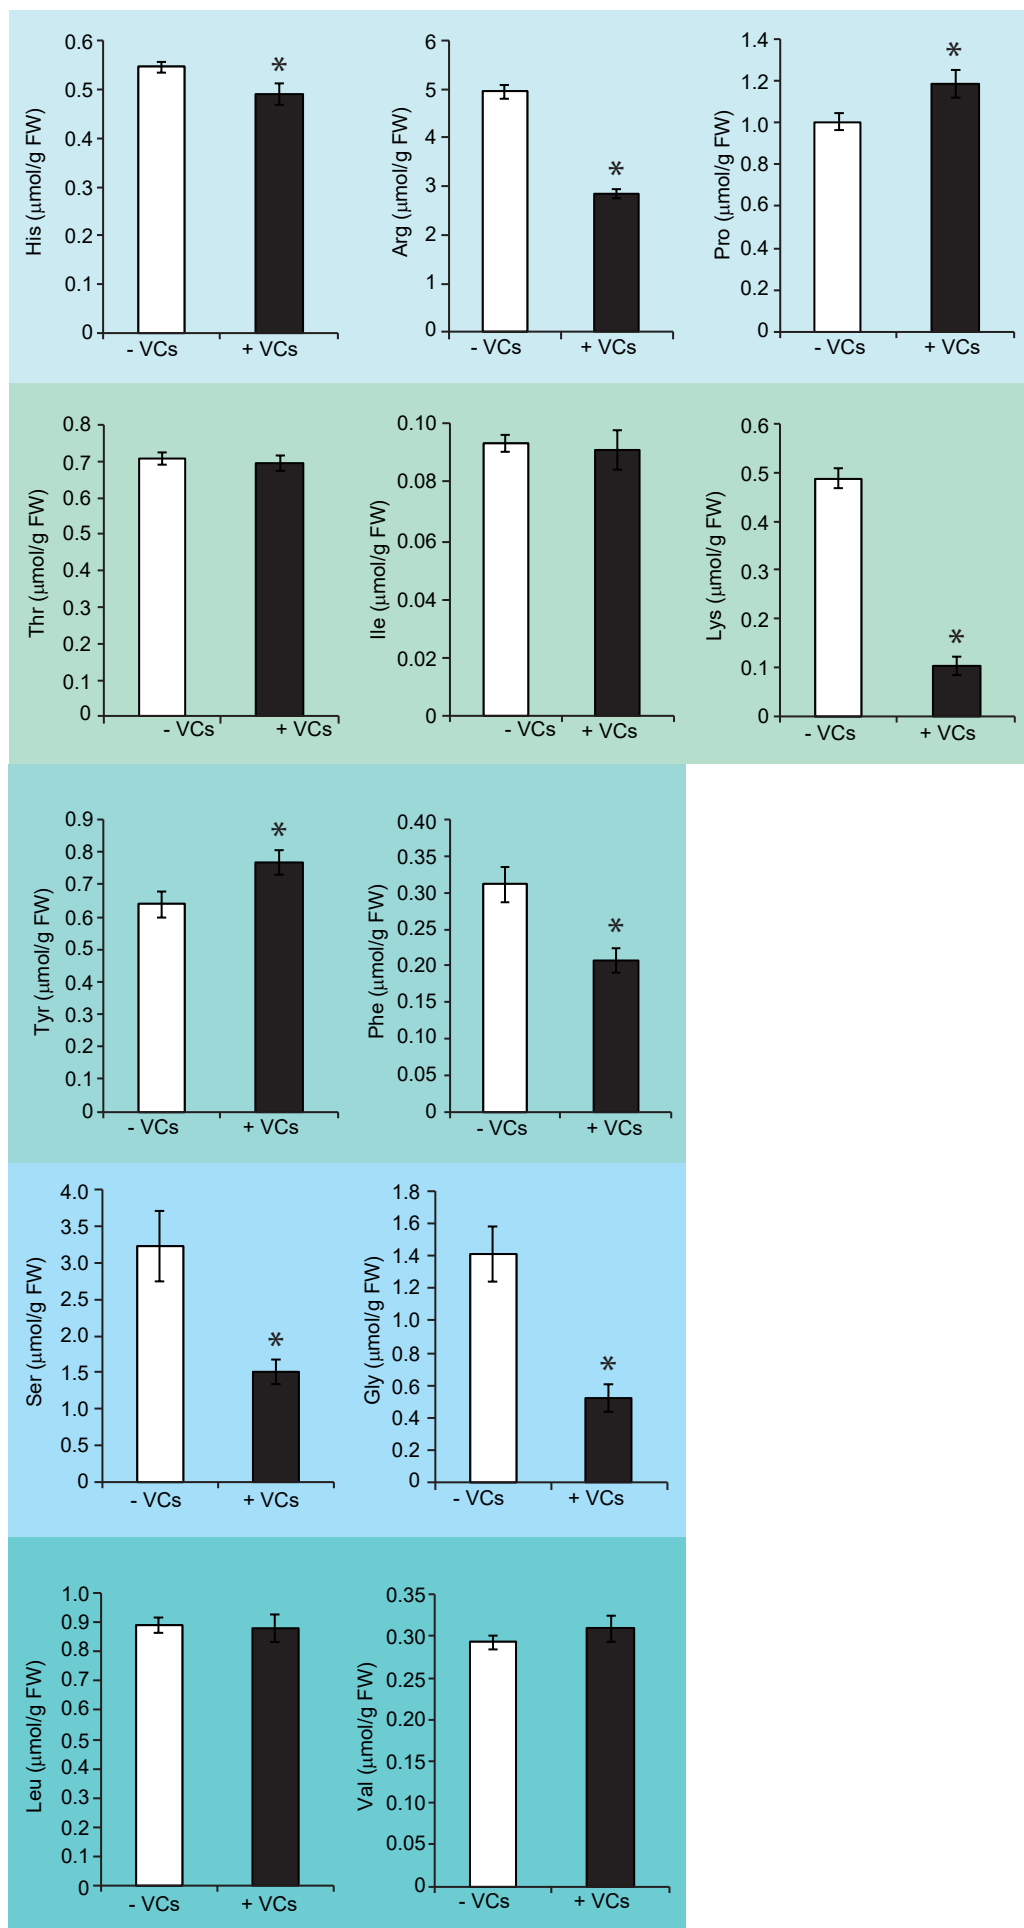

**Supplemental Figure S1:** Free amino acid contents in the leaves of *pgi1-2* plants cultured in the absence or presence of *A. alternata* VCs for three days. Asterisks indicate significant differences between microbial VC-treated plants and controls (non-treated plants) according to the Student's t-tests ( $p < 0.05$ ). The amino acids are grouped according to their biosynthetic families.
