# Supplementary material
Source: PubMed Central journal article supplement (PMC5100789)
Supplement: supp_pp.16.00945_PP2016-00945R1_Supplemental_Material_3.pdf [file supp_pp.16.00945_PP2016-00945R1_Supplemental_Material_3.pdf]

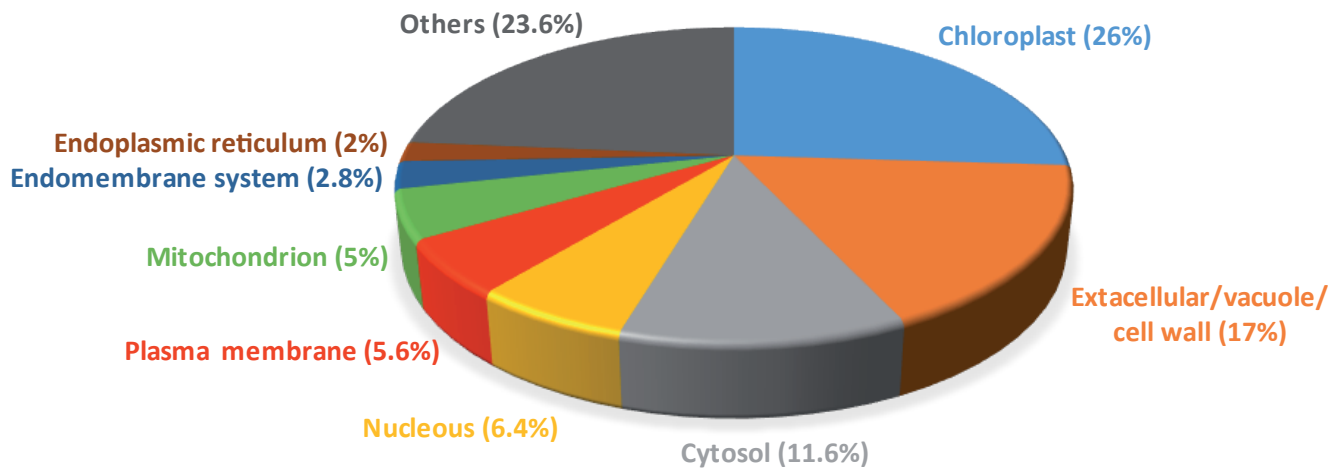

**Supplemental Figure S3:** Categorization of the differentially expressed proteins in the leaves of *pgil-2* plants cultured in the presence of VCs emitted by *A. alternata* according to their subcellular localization. Data are obtained from Supplemental Table S1.
